# Supplementary material
Source: PubMed Central journal article supplement (PMC6954030)
Supplement: 11104_2017_3184_MOESM1_ESM.pdf [file 11104_2017_3184_MOESM1_ESM.pdf]

## **Suppl. figure S2**

### **Amino acid sequence alignment of the 18 putative quinoa MAPKs with all 20 Arabidopsis MAPKs.**

The quinoa genome database (<http://quinoa.kazusa.or.jp/>) was screened for genes annotated as MAPKs, and the corresponding translation products were retrieved. Highly (red; 80%) and moderately (blue; 40%) conserved residues are shown in colour. The alignment was generated using the MultAlin tool. See also phylogenetic tree in figure 3.

### Results colour-coded for amino acid conservation

The current colourscheme of the alignment is for **amino acid conservation**.

The conservation scoring is performed by PRALINE. The scoring scheme works from 0 for the least conserved alignment position, up to 10 for the most conserved alignment position. The colour assignments are:

Unconserved 0 1 2 3 4 5 6 7 8 9 10 Conserved

|                 | ..... 10   | ..... 20    | ..... 30   | ..... 40       | ..... 50      |
|-----------------|------------|-------------|------------|----------------|---------------|
| ATMPK11_B       | -----      | -----       | -----      | -----          | -----         |
| ATMPK13_B       | -----      | -----       | -----      | -----          | -----         |
| ATMPK6_A        | -----      | -----       | -----      | -----          | -----         |
| ATMPK10_A       | -----      | -----       | -----      | -----          | -----         |
| Cqu_c04092_1_g0 | -----MGEA  | SPPGAYATVA  | AS-----W   | LGATT-TAWP     | SRLGAS---H    |
| Cqu_c06022_1_g0 | MVVADATAES | VAAIQYVLSH  | AMQDNDDLIL | MHVTQPTKKS     | HLLIKSFFRR    |
| Cqu_c03819_1_g0 | -----      | -----       | -----      | -----          | -----         |
| Cqu_c04159_1_g0 | -----      | -----       | -----      | -----          | -----         |
| ATMPK3_A        | -----      | -----       | -----      | -----          | -----         |
| Cqu_c03402_1_g0 | -----      | -----       | -----      | -----          | -----         |
| Cqu_c03736_1_g0 | -----      | -----       | -----      | -----          | -----         |
| ATMPK12_B       | -----      | -----       | -----      | -----          | -----         |
| ATMPK4_B        | -----      | -----       | -----      | -----          | -----         |
| ATMPK5_B        | -----      | -----       | -----      | -----          | -----         |
| Cqu_c17078_1_g0 | -----      | -----       | -----      | -----          | -----         |
| ATMPK1_C        | -----      | -----       | -----      | -----          | -----         |
| Cqu_c02858_1_g0 | -----      | -----       | -----      | -----          | -----         |
| ATMPK7_C        | -----      | -----       | -----      | -----          | -----         |
| ATMPK2_C        | -----      | -----       | -----      | -----          | -----         |
| ATMPK14_C       | -----      | -----       | -----      | -----          | -----         |
| ATMPK8_D        | -----      | -----       | -----      | MGG-----       | G GNLVDGVERRW |
| Cqu_c08055_1_g0 | -----      | -----       | -----      | MGN-----       | G -TLVDGVERR- |
| ATMPK15_D       | -----      | -----       | -----      | MGG-----       | G GNLVDGVERRW |
| ATMPK9_D        | -----      | -----       | -----      | -----          | -----         |
| ATMPK18_D       | -----      | -----       | -----      | -----          | -----         |
| ATMPK20_D       | -----      | -----       | -----      | -----          | -----         |
| ATMPK19_D       | -----      | -----       | -----      | -----          | -----         |
| Cqu_c06169_1_g0 | -----      | -----       | -----      | -----          | -----         |
| Cqu_c03735_1_g0 | -----      | -----       | -----      | -----          | -----         |
| ATMPK16_D       | -----      | -----       | -----      | -----          | -----         |
| Cqu_c07086_1_g0 | -----      | -----       | -----      | -----          | -----         |
| Cqu_c09059_1_g0 | -----      | -----       | -----      | -----          | -----         |
| ATMPK17_D       | -----      | -----       | -----      | -----          | -----         |
| Cqu_c04094_1_g0 | -----      | -----       | -----      | -----          | -----         |
| Cqu_c01012_1_g0 | -----      | -----       | -----      | MG-----        | N GTLVDGVERRW |
| Cqu_c14619_1_g0 | -----      | -----       | -----      | -----          | -----         |
| Cqu_c03126_1_g0 | -----      | -----       | -----      | -----          | -----         |
| Cqu_c01012_1_g0 | -----      | -----       | -----      | -----          | -----         |
| Consistency     | 0000000000 | 0000000000  | 0000000000 | 0000000000     | 0000000000    |
|                 | ..... 60   | ..... 70    | ..... 80   | ..... 90       | ..... 100     |
| ATMPK11_B       | -----      | -----       | -----      | -----          | -----         |
| ATMPK13_B       | -----      | -----       | -----      | -----          | -----         |
| ATMPK6_A        | -----      | -----       | -----      | -----          | -----         |
| ATMPK10_A       | -----      | -----       | -----      | -----          | -----         |
| Cqu_c04092_1_g0 | H-----     | -FVLT-----  | -----      | IRYEPR-----    | -FP-----A     |
| Cqu_c06022_1_g0 | HSDPGLAGIS | NFDPTADVGE  | GGGGSGGKDF | LEV MKRACKG    | TFPNSRVWVE    |
| Cqu_c03819_1_g0 | -----      | -----       | -----      | -----          | -----         |
| Cqu_c04159_1_g0 | -----      | -----       | -----      | -----          | -----         |
| ATMPK3_A        | -----      | -----       | -----      | -----          | -----         |
| Cqu_c03402_1_g0 | -----      | -----       | -----      | -----          | -----         |
| Cqu_c03736_1_g0 | -----      | -----       | -----      | -----          | -----         |
| ATMPK12_B       | -----      | -----       | -----      | -----          | -----         |
| ATMPK4_B        | -----      | -----       | -----      | -----          | -----         |
| ATMPK5_B        | -----      | -----       | -----      | -----          | -----         |
| Cqu_c17078_1_g0 | -----      | -----       | -----      | -----          | -----         |
| ATMPK1_C        | -----      | -----       | -----      | -----          | -----         |
| Cqu_c02858_1_g0 | -----      | -----       | -----      | -----          | -----         |
| ATMPK7_C        | -----      | -----       | -----      | -----          | -----         |
| ATMPK2_C        | -----      | -----       | -----      | -----          | -----         |
| ATMPK14_C       | -----      | -----       | -----      | -----          | -----         |
| ATMPK8_D        | -L-----    | -FQRPS----- | -----      | SSS SSSSSNNNNN | NHEQPIFNSS    |
| Cqu_c08055_1_g0 | -W-----    | -FSRRG----- | -----      | GVV ANNSYKLD   | ES INNNSSNSS  |
| ATMPK15_D       | -LF-----   | -FQRRP----- | -----      | SSS SSSNNHDQIQ | NP-----       |

```

ATMPK9_D -----
ATMPK18_D -----
ATMPK20_D -----
ATMPK19_D -----
Cqu_c06169_1_g0 -----
Cqu_c03735_1_g0 -----
ATMPK16_D -----
Cqu_c07086_1_g0 -----
Cqu_c09059_1_g0 -----
ATMPK17_D -----
Cqu_c04094_1_g0 -----
Cqu_c01012_1_g0 ----- FSRRG ----- VVV ANNSYKLD ES INNNNSSNSS
Cqu_c14619_1_g0 -----
Cqu_c03126_1_g0 -----
Cqu_c01012_1_g0 -----
Consistency 0000000000 0000000000 0000000000 0000000000 0000000000

```

..... 110..... 120..... 130..... 140..... 150

```

ATMPK11_B -----
ATMPK13_B -----
ATMPK6_A ----- MDG G SGQPAADT
ATMPK10_A ----- ME ----- PTNDA
Cqu_c04092_1_g0 TMA ----- TLRCIS PPTTSLRVSE SSDTHTIMDA S AAQPSDT
Cqu_c06022_1_g0 KVEQGSLDNK GAVILLRCKE LMVDLLVVGQ RRHLVSVLLG PRRSFSTGST
Cqu_c03819_1_g0 -----
Cqu_c04159_1_g0 -----
ATMPK3_A -----
Cqu_c03402_1_g0 -----
Cqu_c03736_1_g0 -----
ATMPK12_B -----
ATMPK4_B -----
ATMPK5_B -----
Cqu_c17078_1_g0 -----
ATMPK1_C -----
Cqu_c02858_1_g0 -----
ATMPK7_C -----
ATMPK2_C -----
ATMPK14_C -----
ATMPK8_D SF ----- SSS SNPNHSANSG ELIIEEDLDF S ----- GL
Cqu_c08055_1_g0 SSRQVSVISE FSGNQINNHS SSKQQEGEEQ ELNIEFDFDL S ----- GL
ATMPK15_D ----- PTVSNPND DEDLKKLTPD S ----- KL
ATMPK9_D -----
ATMPK18_D -----
ATMPK20_D -----
ATMPK19_D -----
Cqu_c06169_1_g0 -----
Cqu_c03735_1_g0 -----
ATMPK16_D -----
Cqu_c07086_1_g0 -----
Cqu_c09059_1_g0 -----
ATMPK17_D -----
Cqu_c04094_1_g0 ----- MDASAAQPS DTDMMDAAGA PPENHPPPSS
Cqu_c01012_1_g0 SSR ----- QVSVISEF SGKQINNHS SKQQGEEEEQ Q EFNIEFDF
Cqu_c14619_1_g0 -----
Cqu_c03126_1_g0 -----
Cqu_c01012_1_g0 -----
Consistency 0000000000 0000000000 0000000000 0000000000 0000000000

```

..... 160..... 170..... 180..... 190..... 200

```

ATMPK11_B MSIEKPF ----- FGDDSNRGV SINGGRYVQY
ATMPK13_B ----- MEKREDGGI LTYDGRYVMY
ATMPK6_A EMTEAPGGFP AAA ----- PSPQ MPGIENIPAT LSHGGRFIQY
ATMPK10_A ETLETQGEVT TAIWP ----- SSQI LKTTIDIPGT LSHDGRYIQY
Cqu_c04092_1_g0 DMMDAAGAPP ENHPP PSSD QSOPPOQPPQ QQQQVSIPAT LSHGGKFIQY
Cqu_c06022_1_g0 VLRGGAPKSV DMVEYLIENS PCTCVAVQKK GQNSGYILNS KTHRNFWLLY
Cqu_c03819_1_g0 MSEFPMAAA ----- AGG GGQFPEFPAV YTHGGQFIQY
Cqu_c04159_1_g0 MSEFPMAAA ----- AGG GGQFPEFPAV YTHGGQFIQY
ATMPK3_A ----- MNTG GGQYDFPAV ETHGGQFISY
Cqu_c03402_1_g0 ----- ME N SAKSKEVRGI PTYGGTYTMY
Cqu_c03736_1_g0 ----- MEQNLRGV PTHGGRYVQY
ATMPK12_B MSGESSS ----- GSTEHC IKVV PTHGGRYVQY
ATMPK4_B MSAESC FG ----- S SGDQSSSKGV ATHGGSYVQY
ATMPK5_B MAKEIESA ----- T DLGDTNIKGV LVHGGRYFQY
Cqu_c17078_1_g0 ----- MEN SAKSKEVRGI PTYGGTYILY
ATMPK1_C ----- MATLVDPPNG IRNEGK HYF

```

|                 |            |            |            |            |            |            |        |
|-----------------|------------|------------|------------|------------|------------|------------|--------|
| Cqu_c02858_1_g0 | -----      | -----      | -----      | MATQVEPPNG | VRC        | PGK        | -HYY   |
| ATMPK7_C        | -----      | -----      | -----      | MAMLVEPPNG | IKQ        | QGK        | -HYY   |
| ATMPK2_C        | -----      | -----      | -----      | MATPVDPPNG | IRN        | QGK        | -HYF   |
| ATMPK14_C       | -----      | -----      | -----      | MAMLVDPPNG | IRQ        | EGK        | -HYY   |
| ATMPK8_D        | FLINVPKR   | ---        | ---        | ---        | NHLPMD     | PHK        | ---KGE |
| Cqu_c08055_1_g0 | KPIKVPKR   | ---        | ---        | ---        | APTSRFPLP  | MDPHKKS    | SALE   |
| ATMPK15_D       | RQIKVQQR   | ---        | ---        | ---        | NHLPME     | KKG        | ---IPN |
| ATMPK9_D        | ---        | ---        | ---        | ---        | MDPH       | KKV        | ---ALE |
| ATMPK18_D       | ---        | M          | ---        | ---        | QONQV      | KKG        | ---TKE |
| ATMPK20_D       | ---        | M          | ---        | ---        | QDNR       | KKN        | ---NLE |
| ATMPK19_D       | ---        | M          | ---        | ---        | QKTQE      | KKN        | ---MKE |
| Cqu_c06169_1_g0 | ---        | M          | ---        | ---        | QDQR       | KKA        | ---VKE |
| Cqu_c03735_1_g0 | MEQNLRG    | ---        | ---        | ---        | TPTHG      | GRY        | ---VOY |
| ATMPK16_D       | ---        | M          | ---        | ---        | QPDHR      | KKS        | ---SVE |
| Cqu_c07086_1_g0 | ---        | M          | ---        | ---        | QDQR       | KKT        | ---SVD |
| Cqu_c09059_1_g0 | ---        | ---        | ---        | ---        | MQDQR      | KKA        | ---VKE |
| ATMPK17_D       | ---        | ---        | ---        | ---        | ---        | ---        | ---MLE |
| Cqu_c04094_1_g0 | DQSQPPQQP  | ---        | ---        | PQ         | QQQVSIPAT  | LSHGGKFIQY |        |
| Cqu_c01012_1_g0 | DLSGLKPIK  | ---        | ---        | VPK        | RAPTSRFPLP | MDPHKKS    | SALE   |
| Cqu_c14619_1_g0 | ---        | ---        | ---        | ---        | ---        | ---        | ---    |
| Cqu_c03126_1_g0 | ---        | ---        | ---        | ---        | ---        | ---        | ---    |
| Cqu_c01012_1_g0 | ---        | ---        | ---        | ---        | ---        | ---        | ---    |
| Consistency     | 0000001000 | 0000000000 | 0000000000 | 1111132332 | 3431221434 |            |        |

|                 |             |            |            |            |            |       |
|-----------------|-------------|------------|------------|------------|------------|-------|
|                 | .....       | 210.....   | 220.....   | 230.....   | 240.....   | 250   |
| ATMPK11_B       | NVYGNLFEVS  | KKYVPLRPI  | GRGASGIVCA | AWNSETGEEV | AIKKIGNAFG |       |
| ATMPK13_B       | NVLGNIFELS  | SKYIPPIEPI | GRGAYGIVCC | ATNSETNEEV | AIKKIANAFD |       |
| ATMPK6_A        | NIFGNIFEVT  | AKYKPPIMPI | GKGAYGIVCS | AMNSETNESV | AIKKIANAFD |       |
| ATMPK10_A       | NLFGHIFELP  | AKYKPIRPI  | GRGACGIVCS | AVDSETNEKV | AIKKITQVFD |       |
| Cqu_c04092_1_g0 | NIFGNIFEVT  | AKYKPPIMPI | GKGAYGIVCS | SLNSDTNEHV | AIKKIANAFD |       |
| Cqu_c06022_1_g0 | NVHGSLEFEVS | SKYVPIRPI  | GRGASGLVCA | AVNSDTHHEV | AIKKIGNAFD |       |
| Cqu_c03819_1_g0 | NIFGNLFEVT  | AKYRPPIMPI | GRGAYGIVCS | VLNTETKEMV | ALKKIANAFD |       |
| Cqu_c04159_1_g0 | NIFGNLFEVT  | AKYRPPIMPI | GRGAYGIVCS | VLNTETKEMV | ALKKIANAFD |       |
| ATMPK3_A        | DIFGSLFEIT  | SKYRPIPI   | GRGAYGIVCS | VLDTETNELV | AMKKIANAFD |       |
| Cqu_c03402_1_g0 | NILGTLFEVS  | SKYAPPIQPV | GRGAYGIVCC | ARNSETNEDV | AIKKIADAFN |       |
| Cqu_c03736_1_g0 | NLYGNLFEVS  | SKYVPLRPV  | GRGAYGIVCA | AVNSETQEEV | AIKKVSNAFH |       |
| ATMPK12_B       | NVYGQLFEVS  | RKYVPIRPI  | GRGACGIVCA | AVNSVTGEKV | AIKKIGNAFD |       |
| ATMPK4_B        | NVYGNLFEVS  | RKYVPLRPI  | GRGAYGIVCA | ATNSETGEEV | AIKKIGNAFD |       |
| ATMPK5_B        | NVYGNLFEVS  | NKYVPIRPI  | GRGAYGFVCA | AVDSETHEEI | AIKKIGKAFD |       |
| Cqu_c17078_1_g0 | NIFGSLFEVA  | SKYAPPIQPV | GRGAYGIVCC | ARNSETNEDV | AIKKIADAFN |       |
| ATMPK1_C        | SMWQTLFEID  | TKYM-PIKPI | GRGAYGVVCS | SVNSDTNEKV | AIKKIHNVYE |       |
| Cqu_c02858_1_g0 | SMWQALFEID  | TKYV-PIKPI | GRGAYGIVCS | SXNKETNERV | AIKKIHNAFE |       |
| ATMPK7_C        | SMWQTLFEID  | TKYV-PIKPI | GRGAYGVVCS | SINRETNERV | AIKKIHNVFE |       |
| ATMPK2_C        | SMWQTLFEID  | TKYV-PIKPI | GRGAYGVVCS | SVNRESNERV | AIKKIHNVFE |       |
| ATMPK14_C       | TMWQTLFEID  | TKYV-PIKPI | GRGAYGVVCS | SINSETNERV | AIKKIHNVFE |       |
| ATMPK8_D        | TEFFTEYGEA  | NRYQ-IQEVV | GKGSYGVVAS | AVDSHTGERV | AIKKINDVFE |       |
| Cqu_c08055_1_g0 | NDFFTYGEA   | SRYQ-VQEII | GKGSYGIVGS | AVDTHTGEXV | AIKKINDVFE |       |
| ATMPK15_D       | AEFFTEYGEA  | NRYQ-IQEVV | GKGSYGVVGS | AIDTHTGERV | AIKKINDVFD |       |
| ATMPK9_D        | TEFFTEYGEA  | SRYQ-IQEVI | GKGSYGVVAS | AIDTHSGEKV | AIKKINDVFE |       |
| ATMPK18_D       | MEFFTEYGDA  | NRYR-ILEVI | GKGSYGVVCA | AIDTHTGEKV | AIKKINDVFE |       |
| ATMPK20_D       | MEFFSDYGDA  | NRFK-VQEVI | GKGSYGVVCS | AIDTLTGEKV | AIKKIHDIFE |       |
| ATMPK19_D       | MEFFTEYGDA  | NRYR-ILEVI | GKGSYGVVCA | AIDTQTGEKV | AIKKINDVFE |       |
| Cqu_c06169_1_g0 | PEFFTDYGEA  | NRYK-ILEVI | GKGSYGVVCA | AIDTHTGEKV | AIKKINDIYE |       |
| Cqu_c03735_1_g0 | NLYGNVFEVS  | SKYVPLRPV  | GRGAYGIVCA | AVNSETQEEV | AIKKVSNAFH |       |
| ATMPK16_D       | VDFFTYGEA   | SRYR-IEEVI | GKGSYGVVCS | AYDTHTGEXV | AIKKINDIFE |       |
| Cqu_c07086_1_g0 | VDFFTYGEA   | NRYK-IEEVI | GKGSYGVVCS | AYDTHVGEKV | AXKKINDIFE |       |
| Cqu_c09059_1_g0 | PEFFTDYGEA  | NRYK-ILEVI | GKGSYGVVCA | AIDTHTGEKV | AIKKINDXYE |       |
| ATMPK17_D       | KEFFTEYGEA  | SQYQ-IQEVV | GKGSYGVVAS | AECPTHGKGV | AIKKMTNVFE |       |
| Cqu_c04094_1_g0 | NIFGNIFEVT  | AKYKPPIMPI | GKGAYGIVCS | SLNSDTNEHV | AIKKIANAFD |       |
| Cqu_c01012_1_g0 | NDFFTYGEA   | SRYQ-VQEII | GKGSYGIVGS | AVDTHTGEXV | AIKKINDVFE |       |
| Cqu_c14619_1_g0 | ---         | ---        | ---        | ---        | ---        | ---   |
| Cqu_c03126_1_g0 | ---         | ---        | ---        | ---        | ---        | ---   |
| Cqu_c01012_1_g0 | ---         | ---        | ---        | ---        | ---        | MDWYP |
| Consistency     | 4453547544  | 5684145458 | 8786687866 | 6555474748 | 8788846686 |       |

|                 |           |            |          |          |            |            |
|-----------------|-----------|------------|----------|----------|------------|------------|
|                 | .....     | 260.....   | 270..... | 280..... | 290.....   | 300        |
| ATMPK11_B       | NIIDAKRTL | EIKLLKHMDH | -DNVIAI  | -ID      | IIRPPQPDF  | NDVHIVYELM |
| ATMPK13_B       | NRVDAKRTL | EIKLLSHMDH | -DNVIKI  | -KD      | IIELPEKERF | EDVYIVYELM |
| ATMPK6_A        | NKIDAKRTL | EIKLLRHMDH | -ENIVAI  | -RD      | IIPPLRNAF  | NDVYIAYELM |
| ATMPK10_A       | NTIEAKRTL | EIKLLRHFDH | -ENIVAI  | -RD      | VILPPQRDSF | EDVYIVNELM |
| Cqu_c04092_1_g0 | NKVDKRTL  | EIKLLRHMDH | -ENVVAI  | -RD      | IIPPRREAF  | NDVYXAYELM |
| Cqu_c06022_1_g0 | NIVDAKRTL | EIKLLRHMDH | -ENIIAI  | -KD      | IIRPPKKEAF | NDVYIVYELM |
| Cqu_c03819_1_g0 | NYMDAKRTL | EIKILRHFDH | -ENIIVL  | -RD      | VIPPPVRREF | TDVYVATELM |
| Cqu_c04159_1_g0 | NYMDAKRTL | EIKILRHFDH | -ENIIVL  | -RD      | VIPPPVRREF | TDVYVATELM |
| ATMPK3_A        | NHMDAKRTL | EIKLLRHLDH | -ENIIAI  | -RD      | VVPPPLRRQF | SDVYISTELM |

|                 |             |             |            |             |             |
|-----------------|-------------|-------------|------------|-------------|-------------|
| Cqu_c03402_1_g0 | NRIDAKRTLRL | EIKLLCHMDH  | -DNVIKI-KD | IIRPPERENF  | NDVYIVYELL  |
| Cqu_c03736_1_g0 | NRIDAKRILRL | EIKLLRHMDH  | -DNVISI-RD | IIRPPQKENF  | NDVYIMVHEL  |
| ATMPK12_B       | NIIDAKRTLRL | EIKLLRHMDH  | -ENVITI-KD | IVRPPQORDIF | NDVYIVYELM  |
| ATMPK4_B        | NIIDAKRTLRL | EIKLLKHMDH  | -ENVIIV-KD | IIRPPQRENF  | NDVYIVYELM  |
| ATMPK5_B        | NKVDAKRTLRL | EIKLLRHLEH  | -ENVVVI-KD | IIRPPKKEDF  | VDVYIVFELM  |
| Cqu_c17078_1_g0 | NRIDAKRTLRL | EIKLLCHMDH  | -DNVIKI-KD | IIRPPERENF  | NDVYIVYELL  |
| ATMPK1_C        | NRIDALRTLRL | ELKLLRHRLRH | -ENVIAL-KD | VMMPIHKMSF  | KDVYLVYELM  |
| Cqu_c02858_1_g0 | NRVDALRTLRL | ELKLLRHRLRH | -DNVIAL-KD | VMLPAHPKNF  | KDVYLVYELM  |
| ATMPK7_C        | NRVDALRTLRL | ELKLLRHVRH  | -ENVIAL-KD | VMLPANRSSF  | KDVYLVYELM  |
| ATMPK2_C        | NRIDALRTLRL | ELKLLRHRLRH | -ENVVAL-KD | VMMANHKRSF  | KDVYLVYELM  |
| ATMPK14_C       | NRIDALRTLRL | ELKLLRHVRH  | -ENVISL-KD | VMLPTHRYSF  | RDVYLVYELM  |
| ATMPK8_D        | HVSDATRILRL | EIKLLRLLRH  | -PDVVEI-KH | IMLPPSRREF  | RDIYVVFELM  |
| Cqu_c08055_1_g0 | HVSDATRILRL | EIKLLRLLRH  | -PDVVEI-KH | IMLPPSRREF  | KDIYVVFELM  |
| ATMPK15_D       | HISDATRILRL | EIKLLRLLRH  | -PDVVEI-KH | IMLPPSRREF  | RDVYVVFELM  |
| ATMPK9_D        | HVSDATRILRL | EIKLLRLLRH  | -PDIVEI-KH | VMLPPSRREF  | RDIYVVFELM  |
| ATMPK18_D       | HISDALRILRL | EVKLLRLLRH  | -PDIVEI-KS | IMLPPSKREF  | KDIYVVFELM  |
| ATMPK20_D       | HISDAARILRL | EIKLLRLLRH  | -PDIVEI-KH | IMLPPSRREF  | KDIYVVFELM  |
| ATMPK19_D       | HVSDALRILRL | EVKLLRLLRH  | -PDIVEI-KS | IMLPPSKREF  | KDIYVVFELM  |
| Cqu_c06169_1_g0 | HISDAIRILRL | EVKLLRLLRH  | -PDIVEI-KR | IMXPPSKRDF  | RDIYVVFELM  |
| Cqu_c03735_1_g0 | NRIDAKRILRL | EIKLLRHMDH  | -DNVISI-RD | IIRPPQKENF  | NDVYIMVHELM |
| ATMPK16_D       | HVSDATRILRL | EIKLLRLLRH  | -PDIVEI-KH | ILLPPSRREF  | RDIYVVFELM  |
| Cqu_c07086_1_g0 | HVSDATRILRL | EIKLLRLLRH  | -PDIVEI-KH | ILLPPSRREF  | KDIYVVFELM  |
| Cqu_c09059_1_g0 | HISDAIXILRL | EVKLLRLLRH  | -PDIVEI-KR | IMLPPSKRDF  | RDIYVVLLELM |
| ATMPK17_D       | HVSDAIRILRL | EIKLLRLLRH  | -PDIVEI-KH | IMLPPCRKEF  | KDIYVVFELM  |
| Cqu_c04094_1_g0 | NKVDAKRTLRL | EIKLLRHMDH  | -ENVVAI-RD | IIPPPRREAF  | NDVYIAYELM  |
| Cqu_c01012_1_g0 | HVSDATRILRL | EIKLLRLLHF  | -AHET      |             |             |
| Cqu_c14619_1_g0 |             |             |            |             |             |
| Cqu_c03126_1_g0 |             |             |            |             |             |
| Cqu_c01012_1_g0 | GHGVDRFKRQ  | FAHLEEHGK   | GEKSTPLSRQ | HASLPRERVP  | APKTDANENN  |
| Consistency     | 6458848588  | 8788875648  | 0567747065 | 7637636447  | 4877665887  |

|                 |            |             |            |            |            |     |
|-----------------|------------|-------------|------------|------------|------------|-----|
|                 |            | 310         | 320        | 330        | 340        | 350 |
| ATMPK11_B       | DTDLHHIIRS | NQPLTDDHSR  | FFLYQLLRGL | KYVHSANVLH | RDLKPSNLLL |     |
| ATMPK13_B       | DTDLHQIIRS | TQTLTDDHCQ  | YFLYQILRGL | KYIHSANVLH | RDLKPSNLVL |     |
| ATMPK6_A        | DTDLHQIIRS | NQALSEEHCQ  | YFLYQILRGL | KYIHSANVLH | RDLKPSNLLL |     |
| ATMPK10_A       | EFDLYRTLKS | DQELTKDHGM  | YFMYQILRGL | KYIHSANVLH | RDLKPSNLLL |     |
| Cqu_c04092_1_g0 | DTDLHQIIRS | NQGLSEEHCQ  | YFLYQXLRGL | KYIHSANVLH | RDLKPSNLLL |     |
| Cqu_c06022_1_g0 | DTDLHQIIRS | SQALTDDHCQ  | YFLYQLLRGL | KYVHSAKVLH | RDLKPSNLLL |     |
| Cqu_c03819_1_g0 | DTDLHQIIRS | HQSLSEEHCQ  | YFLYQILRGL | KYIHSANVIH | RDLKPSNLLI |     |
| Cqu_c04159_1_g0 | DTDLHQIIRS | HQSLSEEHCQ  | YFLYQILRGL | KYIHSANVIH | RDLKPSNLLI |     |
| ATMPK3_A        | DTDLHQIIRS | NQSLSEEHCQ  | YFLYQLLRGL | KYIHSANIIH | RDLKPSNLLL |     |
| Cqu_c03402_1_g0 | DTDLHQIIRS | TQELTEDHCQ  | YFLYQILRGL | KYIHSANVLH | RDLKPSNLLL |     |
| Cqu_c03736_1_g0 | DTDLHQIIRS | NQQLTDDHCR  | YFLYQILRGL | KYIHSAGVLH | RDLKPSNLLM |     |
| ATMPK12_B       | DTDLQRIIRS | NQTLTSDQCR  | FLVYQLLRGL | KYVHSANILH | RDLRPSNVLL |     |
| ATMPK4_B        | DTDLHQIIRS | NQPLTDDHCR  | FFLYQLLRGL | KYVHSANVLH | RDLKPSNLLL |     |
| ATMPK5_B        | DTDLHQIIRS | NQSLNDDHCQ  | YFLYQILRGL | KYIHSANVLH | RDLKPSNLLL |     |
| Cqu_c17078_1_g0 | DTDLHQIIRS | TQELTEDHCQ  | YFLYQILRGL | KYIHSANVLH | RDLKPSNLLL |     |
| ATMPK1_C        | DTDLHQIIRS | SQVLSNDHCQ  | YFLFQLLRGL | KYIHSANILH | RDLKPGNLLV |     |
| Cqu_c02858_1_g0 | DTDLHQIIRS | SQALSNDHCQ  | YFLFQLLRGL | KYLHSANILH | RDLKPGNLLI |     |
| ATMPK7_C        | DTDLHQIIRS | SQSLSDDHCQ  | YFLFQLLRGL | KYLHSANILH | RDLKPGNLLV |     |
| ATMPK2_C        | DTDLHQIIRS | SQVLSNDHCQ  | YFLFQLLRGL | KYIHSANILH | RDLKPGNLLV |     |
| ATMPK14_C       | DSDLNQIIRS | SQSLSDDHCQ  | YFLFQLLRGL | KYLHSANILH | RDLKPGNLLV |     |
| ATMPK8_D        | ESDLHQVIKA | NDDLTPPEHYQ | FFLYQLLRGL | KYVHAANVFH | RDLKPKNILA |     |
| Cqu_c08055_1_g0 | ESDLHQVIKA | NDDXTPEHYQ  | FFLYQLLRGL | KYVHTANVFH | RDLKPKNILA |     |
| ATMPK15_D       | ESDLHQVIKA | NDDLTPPEHQ  | FFLYQLLRGL | KYVHAANVFH | RDLKPKNILA |     |
| ATMPK9_D        | ESDLHQVIKA | NDDLTPPEHYQ | FFLYQLLRGL | KFIHTANVFH | RDLKPKNILA |     |
| ATMPK18_D       | ESDLHQVIKA | NDDLTPPEHQ  | FFLYQMLRAL | KFMHTANVYH | RDLKPKNILA |     |
| ATMPK20_D       | ESDLHQVIKA | NDDLTPPEHYQ | FFLYQLLRGL | KYIHTANVYH | RDLKPKNILA |     |
| ATMPK19_D       | ESDLHQVIKA | NDDLTPPEHQ  | FFLYQMLRAL | KYMHTANVYH | RDLKPKNILA |     |
| Cqu_c06169_1_g0 | ESDLHQVIKA | NDDLTPPEHQ  | FFLYQMLRAL | KYMHTANVYH | RDLKPKNILA |     |
| Cqu_c03735_1_g0 | DTDLHQIIRS | NQQLTDDHCR  | YFLYQILRGL | KYIHSAGVLH | RDLKPSNLLM |     |
| ATMPK16_D       | ESDLHQVIKA | NDDLTPPEHYQ | FFLYQLLRGL | KYIHTANVFH | RDLKPKNILA |     |
| Cqu_c07086_1_g0 | ESDXHQVIKA | NDDLTPPEHYQ | FFLYQLLRGL | KYIHTANVFH | RDLKPKNILA |     |
| Cqu_c09059_1_g0 | ESDLHQVIKA | NDDLTPPEHQ  | FFLYQMLRAL | KYMHTANVYH | RDLKPKNILA |     |
| ATMPK17_D       | ESDLHHVLKV | NDDLTPQHHQ  | FFLYQLLRGL | KFMHSAHVFH | RDLKPKNILA |     |
| Cqu_c04094_1_g0 | DTDLHQIIRS | NQGLSEEHCQ  | YFLYQILRGL | KYNIFCQCSY | RDLKPSNLCL |     |
| Cqu_c01012_1_g0 |            | RPCS        | VALTTDDQIF | SSSYAANVFH | RDLKPKNILA |     |
| Cqu_c14619_1_g0 |            |             |            |            |            |     |
| Cqu_c03126_1_g0 |            |             |            |            |            |     |
| Cqu_c01012_1_g0 | DMENRAVART | ALE-SPPKSN  | ADGSENEVPQ | NGQNKGNYS  | RSLKKSASIS |     |
| Consistency     | 6687777776 | 5547646746  | 6787868868 | 8768687758 | 8888858785 |     |

|           |            |            |           |            |            |     |
|-----------|------------|------------|-----------|------------|------------|-----|
|           |            | 360        | 370       | 380        | 390        | 400 |
| ATMPK11_B | NANCDLKIGD | FGLARTK--- | SETDFMTEY | VVTRWYRAPE | LLLNC-SEYT |     |
| ATMPK13_B | NTNCDLKICD | FGLARTS--- | NETEIMTEY | VVTRWYRAPE | LLLNS-SEYT |     |

|                 |            |            |       |         |         |            |        |       |     |     |     |     |    |      |    |      |
|-----------------|------------|------------|-------|---------|---------|------------|--------|-------|-----|-----|-----|-----|----|------|----|------|
| ATMPK6_A        | NANCDLKICD | FGLARVT    | ---   | SE      | SDFMTEY | VVTRWYRAPE | LLNS   | SDYT  |     |     |     |     |    |      |    |      |
| ATMPK10_A       | STQCDLKICD | FGLARAT    | ---   | PES     | NLMTEY  | VVTRWYRAPE | LLGS   | SDYT  |     |     |     |     |    |      |    |      |
| Cqu_c04092_1_g0 | NANCDLKICD | FGLARVT    | ---   | SET     | SDFMTEY | VVTRWYRAPE | LLNS   | SDYT  |     |     |     |     |    |      |    |      |
| Cqu_c06022_1_g0 | NANCDLKIGD | FGLARTT    | ---   | TET     | SDFMTEY | VVTRWYRAPE | LLNC   | SEYT  |     |     |     |     |    |      |    |      |
| Cqu_c03819_1_g0 | NANCDLKICD | FGLARPT    | ---   | SENE    | HMTTEY  | VVTRWYRAPE | LLNS   | SDYT  |     |     |     |     |    |      |    |      |
| Cqu_c04159_1_g0 | NANCDLKICD | FGLARPT    | ---   | SENE    | HMTTEY  | VVTRWYRAPE | LLNS   | SDYT  |     |     |     |     |    |      |    |      |
| ATMPK3_A        | NANCDLKICD | FGLARPT    | ---   | SEN     | SDFMTEY | VVTRWYRAPE | LLNS   | SDYT  |     |     |     |     |    |      |    |      |
| Cqu_c03402_1_g0 | NANCDLKICD | FGLARTT    | ---   | AET     | SDFMTEY | VVTRWYRAPE | LLNC   | SEYT  |     |     |     |     |    |      |    |      |
| Cqu_c03736_1_g0 | NANCDLKIGD | FGLARTT    | ---   | SET     | SDFMTEY | VVTRWYRAPE | LLNC   | SEYT  |     |     |     |     |    |      |    |      |
| ATMPK12_B       | NSKNELKIGD | FGLARTT    | ---   | SDT     | SDFMTEY | VVTRWYRAPE | LLNC   | SEYT  |     |     |     |     |    |      |    |      |
| ATMPK4_B        | NANCDLKLGD | FGLARTK    | ---   | SET     | SDFMTEY | VVTRWYRAPE | LLNC   | SEYT  |     |     |     |     |    |      |    |      |
| ATMPK5_B        | NSNCDLKITD | FGLARTT    | ---   | SET     | EYMTTEY | VVTRWYRAPE | LLNS   | SEYT  |     |     |     |     |    |      |    |      |
| Cqu_c17078_1_g0 | NANCDLKICD | FGLARTT    | ---   | AET     | SDFMTEY | VVTRWYRAPE | LLNC   | SEYT  |     |     |     |     |    |      |    |      |
| ATMPK1_C        | NANCDLKICD | FGLARAS    | ---   | NTK     | GQFMTEY | VVTRWYRAPE | LLCC   | DNYG  |     |     |     |     |    |      |    |      |
| Cqu_c02858_1_g0 | NANCDLKICD | FGLARTS    | ---   | SGK     | GQFMTEY | VVTRWYRAPE | LLCC   | DKYG  |     |     |     |     |    |      |    |      |
| ATMPK7_C        | NANCDLKICD | FGLARTS    | ---   | QGN     | EQFMTEY | VVTRWYRAPE | LLCC   | DNYG  |     |     |     |     |    |      |    |      |
| ATMPK2_C        | NANCDLKICD | FGLARTS    | ---   | NTK     | GQFMTEY | VVTRWYRAPE | LLCC   | DNYG  |     |     |     |     |    |      |    |      |
| ATMPK14_C       | NANCDLKICD | FGLART     | ---   | YE      | QFMTEY  | VVTRWYRAPE | LLCC   | DNYG  |     |     |     |     |    |      |    |      |
| ATMPK8_D        | NADCKLKICD | FGLARVSFND | APT   | AIFWTDY | VATR    | WYRAPE     | LCGSFF | SKYT  |     |     |     |     |    |      |    |      |
| Cqu_c08055_1_g0 | NADCKLKICD | FGLARVSFND | APS   | AIFWTDY | VATR    | WYRAPE     | LCGSFF | SKYT  |     |     |     |     |    |      |    |      |
| ATMPK15_D       | NADCKLKICD | FGLARVSFND | APT   | AIFWTDY | VATR    | WYRAPE     | LCGSFF | SKYT  |     |     |     |     |    |      |    |      |
| ATMPK9_D        | NSDCKLKICD | FGLARVSFND | APS   | AIFWTDY | VATR    | WYRAPE     | LCGSFF | SKYT  |     |     |     |     |    |      |    |      |
| ATMPK18_D       | NANCKLKVCD | FGLARVAFND | TPT   | TVFWDY  | VATR    | WYRAPE     | LCGSFF | SKYT  |     |     |     |     |    |      |    |      |
| ATMPK20_D       | NANCKLKVCD | FGLARVAFND | TPT   | TVFWDY  | VATR    | WYRAPE     | LCGSFF | SKYT  |     |     |     |     |    |      |    |      |
| ATMPK19_D       | NANCKLKVCD | FGLARVSFND | TPT   | TVFWDY  | VATR    | WYRAPE     | LCGSFF | SKYT  |     |     |     |     |    |      |    |      |
| Cqu_c06169_1_g0 | NANCKLKVCD | FGLARVAFND | TPT   | TVFWDY  | VATR    | WYRAPE     | LCGSFF | SKYT  |     |     |     |     |    |      |    |      |
| Cqu_c03735_1_g0 | NANCDLKIGD | FGLART     | ---   | TSET    | SDFMTEY | VVTRWYRAPE | LLN    | CSEYT |     |     |     |     |    |      |    |      |
| ATMPK16_D       | NADCKLKICD | FGLARVAFND | TPT   | AIFWTDY | VATR    | WYRAPE     | LCGSFF | SKYT  |     |     |     |     |    |      |    |      |
| Cqu_c07086_1_g0 | NADCKLKICD | FGLARVAFND | TPT   | AIFWTDY | VATR    | WYRAPE     | LCGSFF | SKYT  |     |     |     |     |    |      |    |      |
| Cqu_c09059_1_g0 | NANCKLKVCD | FGLARVAFND | TPT   | TVFWDY  | VATR    | WYRAPE     | LCGSFF | SKYT  |     |     |     |     |    |      |    |      |
| ATMPK17_D       | NADCKIKICD | LGLARVSFTD | SPS   | AVFWDY  | VATR    | WYRAPE     | LCGSFF | SNYT  |     |     |     |     |    |      |    |      |
| Cqu_c04094_1_g0 | -----      | -----      | ----- | -----   | -----   | MPTR       | WYRAPE | LLN   |     |     |     |     |    |      |    |      |
| Cqu_c01012_1_g0 | NADCKLKICD | FGLARVSFND | APS   | AIFWTDY | VATR    | WYRAPE     | LCGSFF | SKYT  |     |     |     |     |    |      |    |      |
| Cqu_c14619_1_g0 | -----      | -----      | ----- | -----   | -----   | -----      | -----  | YT    |     |     |     |     |    |      |    |      |
| Cqu_c03126_1_g0 | -----      | MLYFHT     | ---   | TG      | ESFLTDY | VVMR       | WYKEPE | L     |     |     |     |     |    |      |    |      |
| Cqu_c01012_1_g0 | GSKC       | IGV        | ---   | ---     | ---     | QSRK       | DPEEE  | PIAE  |     |     |     |     |    |      |    |      |
| Consistency     | 7768       | 5888       | 57    | 7888    | 855     | 111        | 1444   | 375   | 868 | 868 | 999 | 889 | 99 | 9545 | 30 | 6486 |

|                 |            |            |     |          |        |             |        |       |
|-----------------|------------|------------|-----|----------|--------|-------------|--------|-------|
| ATMPK11_B       | AAIDIWSVGC | ILGEIMT    | --- | RE       | PLFPGR | DYVQQLRLIT  | ELIGSP | DDSS  |
| ATMPK13_B       | GAIDIWSVGC | IFMEILR    | --- | RE       | TLFPGR | DYVQQLKLIT  | ELIGSP | DDSD  |
| ATMPK6_A        | AAIDVWSVGC | IFMELMD    | --- | RK       | PLFPGR | DHVHQLRLLM  | ELIGTP | SEEE  |
| ATMPK10_A       | AAIDVWSVGC | IFMEIMN    | --- | RE       | PLFPGR | DQVNQLRLLL  | ELIGTP | SEEE  |
| Cqu_c04092_1_g0 | AAIDVWSVGC | IFMELMD    | --- | RK       | PLFPGR | DHVHQLRLLM  | ELIGTP | SEHE  |
| Cqu_c06022_1_g0 | AAIDVWSVGC | IFGEIMT    | --- | RE       | PLFPGR | DYVHQLRLIT  | ELIGSP | DDSS  |
| Cqu_c03819_1_g0 | ASIDLWSVGC | IFMELMN    | --- | RR       | PLFPGR | DHVHQMRLLT  | ELLGTP | TEAD  |
| Cqu_c04159_1_g0 | ASIDLWSVGC | IFMELMN    | --- | RK       | PLFPGR | DHVHQMRLLT  | ELLGTP | TEAD  |
| ATMPK3_A        | AAIDVWSVGC | IFMELMN    | --- | RK       | PLFPGR | DHVHQMRLLT  | ELLGTP | TESD  |
| Cqu_c03402_1_g0 | AAIDMWSVGC | IMMEI IK   | --- | RE       | PLFPGR | DYLOQLQLIN  | ELLGSP | PEDSD |
| Cqu_c03736_1_g0 | AAIDTWSVGC | ILGEIMT    | --- | RE       | PLFPGR | DYVHQLKLV   | ELIGSP | DDSS  |
| ATMPK12_B       | AAIDIWSVGC | ILGEIMT    | --- | GQ       | PLFPGR | DYVHQLRLIT  | ELVGSP | DNSS  |
| ATMPK4_B        | AAIDIWSVGC | ILGETMT    | --- | RE       | PLFPGR | DYVHQLRLIT  | ELIGSP | DDSS  |
| ATMPK5_B        | SAIDVWSVGC | IFAEIMT    | --- | RE       | PLFPGR | DYVHQLKLIT  | ELIGSP | DGAS  |
| Cqu_c17078_1_g0 | AAIDMWSVGC | IMMEI IK   | --- | KE       | PLFPGR | DYLOQLQLIN  | ELLGSP | PEDSD |
| ATMPK1_C        | TSIDVWSVGC | IFAEILG    | --- | RK       | PIFQGT | ECLNQLKLIV  | NILGSQ | REED  |
| Cqu_c02858_1_g0 | TSIDVWSVGC | IFAEILG    | --- | RK       | PLFPGT | ECLNQLKLIV  | NILGSQ | RDAD  |
| ATMPK7_C        | TSIDVWSVGC | IFAEILG    | --- | RK       | PIFPGT | ECLNQLKLII  | NVGSQ  | QESD  |
| ATMPK2_C        | TSIDVWSVGC | IFAEILG    | --- | RK       | PVFPGT | ECLNQIKLII  | NILGSQ | REED  |
| ATMPK14_C       | TSIDVWSVGC | IFAEILG    | --- | RK       | PIFPGT | ECLNQLKLII  | NVGSQ  | QDWD  |
| ATMPK8_D        | PAIDIWSVGC | IFAEMLL    | --- | GK       | PLFPGR | NVVHQLDLMT  | DFLGTP | PPES  |
| Cqu_c08055_1_g0 | PAIDIWSIGC | IFAEMLT    | --- | GK       | PLFPGR | NVVHQLDLMT  | DLMGTP | PPPEA |
| ATMPK15_D       | PAIDIWSVGC | IFAEMLL    | --- | GK       | PLFPGR | NVVHQLDIMT  | DFLGTP | PPPEA |
| ATMPK9_D        | PAIDIWSIGC | IFAEMLT    | --- | GK       | PLFPGR | NVVHQLDIMT  | DLLGTP | PPPEA |
| ATMPK18_D       | PAIDVWSIGC | IFAEVLT    | --- | GK       | PLFPGR | SVVHQLLELIT | DLLGTP | PKSET |
| ATMPK20_D       | PAIDIWSIGC | IFAEVLM    | --- | GK       | PLFPGR | NVVHQLDLMT  | DLLGTP | PSLDT |
| ATMPK19_D       | PAIDIWSIGC | IFAEVLT    | --- | GK       | PLFPGR | SVVHQLDLIT  | DLLGTP | PKSET |
| Cqu_c06169_1_g0 | PAIDIWSIGC | IFAEVLT    | --- | GK       | PLFPGR | SVVHQLDIIT  | DLLGTP | PSHDV |
| Cqu_c03735_1_g0 | AAIDIWSVGC | ILGEIMT    | --- | RE       | PLFPGR | DYVHQLKLV   | ELIGSP | DDSS  |
| ATMPK16_D       | PAIDIWSIGC | IFAEMLT    | --- | GK       | PLFPGR | NVVHQLDLMT  | DMLGTP | PSAEA |
| Cqu_c07086_1_g0 | PAIDIWSIGC | IFAEMLT    | --- | GK       | PLFPGR | NVVHQLDLMT  | ELLGTP | SPDA  |
| Cqu_c09059_1_g0 | PAIDIWSIGC | IFAEVLT    | --- | GK       | PLFPGR | SVVHQLDIIT  | DLLGTP | PSHDV |
| ATMPK17_D       | PAIDMWSVGC | IFAEMLT    | --- | GK       | PLFPGR | NVVHQLLELVT | DLLGTP | SPIT  |
| Cqu_c04094_1_g0 | SSDLQLLSM  | YVEDALA    | --- | HH       | YLSLH  | DISDEPICMS  | -----  | PFC   |
| Cqu_c01012_1_g0 | PAIDIWSIGV | YLOKCSLENH | YS  | WKKCGASV | GPMDR  | -----       | SYGD   | STP   |
| Cqu_c14619_1_g0 | PAIDIWSIGC | IFAEMLT    | --- | GK       | PLFPGR | NVVHQLDLMT  | ELLGTP | SPDA  |

Cqu\_c03126\_1\_g0 ---QIKF IINFL--- ---GSPSESD  
 Cqu\_c01012\_1\_g0 NEEAVDELTK KATALAT---  
 Consistency 4789789988 8758774000 0046788786 5376874765 5668674444

..... 460..... 470..... 480..... 490..... 500

ATMPK11\_B LGFLRSDNAR RYVRQLPQYP RQNFAARFPN MSVNAVDLLQ KMLVFDPNRR  
 ATMPK13\_B LDFLRSDNAR KYVKQLPHVQ KQSFREKFPN ISPMALDLAE KMLVFDPSKR  
 ATMPK6\_A LEFL-NENAK RYIRQLPPYP RQSITDKFPT VHPLAIDLIE KMLTFDPRRR  
 ATMPK10\_A LGSL-SEYAK RYIRQLPTLP RQSFTEKFPN VPPLAIDLVE KMLTFDPKQR  
 Cqu\_c04092\_1\_g0 LGFL-NENAK RYIRQLPPFR RQSLSEKFPX VHPAAIDLIE KMLTFDPRQR  
 Cqu\_c06022\_1\_g0 LGFLRSNHAR RYVKQLPQYP KQQFSARFPN MSPAATDLE KMLVFDPNKR  
 Cqu\_c03819\_1\_g0 LGFLHNEDAR RYIRQLPPQP RQQLRQVFPN VNPLAIDLIE KMLTFDPTRR  
 Cqu\_c04159\_1\_g0 LGFLHNEDAR RYIRQLPPQP RQQLRQLFPH VNPLAIDLIE RMLTFDPTRR  
 ATMPK3\_A LGFTHNEDAK RYIRQLPNFP RQPLAKLFVH VNPMAIDLVD RMLTFDPNRR  
 Cqu\_c03402\_1\_g0 LGFLRSENAK KYIKQLPHVP KQPF SHKFPS VSPLVLDLAE KMLVFDPSKR  
 Cqu\_c03736\_1\_g0 IAFLOSENAK RYVRQLPQYP RQQFSVKFPN ASPLAIDLLE KMLVFDPSKR  
 ATMPK12\_B LGFLRSDNAR RYVRQLPRYP KQQFAARFPK MPTTAIDLLE RMLVFDPNRR  
 ATMPK4\_B LGFLRSDNAR RYVRQLPQYP RQNFAARFPN MSAGAVDLE KMLVFDPSRR  
 ATMPK5\_B LEFLRSANAR KYVKELPKFP RQNF SARFPS MNSTAILLE KMLVFDPVKR  
 Cqu\_c17078\_1\_g0 LGFLRSENAK KYIKQLPHVP KQPF SHKFPS VSPLVLDLAE KMLVFDPSKR  
 ATMPK1\_C LEFIDNPKAK RYIRSLPYS GMSLSRLYPG AHVLAIDLLO KMLVFDPSKR  
 Cqu\_c02858\_1\_g0 LEFIDNPKAK RFIKSLPYS TASLSRLYPT ANPLAIDLLO KMLVFDPTKR  
 ATMPK7\_C IRFIDNPKAR RFIKSLPYSR GTHLSNLYPQ ANPLAIDLLO RMLVFDPTKR  
 ATMPK2\_C LEFIDNPKAK RYIESLPYS GISFSRLYPG ANVLAIDLLO KMLVLDPSKR  
 ATMPK14\_C LQFIDNQKAR RFIKSLPFSK GTHFSHIYPH ANPLAIDLLO RMLVFDPTKR  
 ATMPK8\_D ISRIRNEKAR RYLSMRKKQ PVPF SHKFPK ADPLALRLE RLLAFDPKDR  
 Cqu\_c08055\_1\_g0 ISRIRNEKAR RYLSXMRKKP PIPFSQKFPN VDPLALRLE RLLAFDPKDR  
 ATMPK15\_D ISKIRNDKAR RYLGMRKKQ PVPFSKKFPK ADPSALRLE RLLAFDPKDR  
 ATMPK9\_D IARIRNEKAR RYLGMRKKP PVPFTHKFPH VDPLALRLLH RLLAFDPKDR  
 ATMPK18\_D ISGVRNDKAR KYLTEMRKKN PVTFSQKFSK ADPLALRLLQ RLLAFDPKDR  
 ATMPK20\_D ISVRNEKAR RYLTSMRKKP PIPFAQKFPN ADPLSLKLE RLLAFDPKDR  
 ATMPK19\_D IAGVRNEKAR KYLNEMRKKN LVPFSQKFPN ADPLALRLLQ RLLAFDPKDR  
 Cqu\_c06169\_1\_g0 ISGVRNDKAR KYLDMRKKQ PVPF SHKFSN ADPLALRLLQ RLLSFDPKDR  
 Cqu\_c03735\_1\_g0 IAFLOSENAK RYVRQLPQYP RQQFSVKFPN ASPLAIDLLE KMLVFDPSKR  
 ATMPK16\_D IGRVRNEKAR RYLSMRKKK PIPF SHKFPH TDPLALRLE KMLSFEPKDR  
 Cqu\_c07086\_1\_g0 IARIRNEXAR RYLSMRKKK PIPFTHKFPN ADPLALRLE RMLAFEPKDR  
 Cqu\_c09059\_1\_g0 ISGVRNDKAR KYLDMRKKQ PVPF SHKFSN ADPLALRLLQ RLLSFDPKDR  
 ATMPK17\_D LSRIRNEKAR KYLGMRKKD PVPFTHKFPN IDPVALKLLQ RLLAFDPKDR  
 Cqu\_c04094\_1\_g0 FDFEQHALSE EQMRELIYRE ALAFNPEFQQ E-----  
 Cqu\_c01012\_1\_g0 -----  
 Cqu\_c14619\_1\_g0 IAPG-LSRSS PIISIMRKKK AYSFHHKFPN ADPLAFVCWN EMLAVEPKDR  
 Cqu\_c03126\_1\_g0 LAFIKNQNVV KFIEGMPYSN GVRLEDEYLW ANPLALDLLR RMLVLNPTKR  
 Cqu\_c01012\_1\_g0 -----  
 Consistency 7446465586 7774575344 3447535874 5465765866 6785778448

..... 510..... 520..... 530..... 540..... 550

ATMPK11\_B ITVDEALCHP YLAPLHEYNE -----EPV C--VRPFHFD F-EQPSLTEE  
 ATMPK13\_B ITVDEALKQP YLASLHEINE -----EPT C--PTPFSFD F-EETALDEQ  
 ATMPK6\_A ITVDALAHF YLNSLHDISD -----EPE C--TIPFNFD F-ENHALSEE  
 ATMPK10\_A ISVKEALAHF YLSSFHDITD -----EPE C--SEPFNFD L-DEHPFSEE  
 Cqu\_c04092\_1\_g0 ITVEDALAHF YLNSLHDISD -----EPI C--MSPFCFD F-EQHALSEE  
 Cqu\_c06022\_1\_g0 VTVDEALCHP YLASLHDIND -----EPI C--SAPFRFD F-EQSSLTEE  
 Cqu\_c03819\_1\_g0 ITVEEALAHF YLARLHDIAD -----EPV C--QEPFSFD F-ENQALTEE  
 Cqu\_c04159\_1\_g0 ITVEEALAHF YLARLHDIAD -----EPV C--QEPFSFD F-ENQALTEE  
 ATMPK3\_A ITVEQALNHQ YLAKLHDPND -----EPI C--QKPFSE F-EQOPLDEE  
 Cqu\_c03402\_1\_g0 ITVDEALNHP YLSSLHEINE -----EPT C--PKPFQFD F-EQSTLDEE  
 Cqu\_c03736\_1\_g0 ITVHEALCHP YLAPLHDINE -----EPV C--PQPFSFD F-EQPSFTEE  
 ATMPK12\_B ISVDEALGHA YLSPHHDVAK -----EPV C--STPFSFD F-EHPSCTEE  
 ATMPK4\_B ITVDEALCHP YLAPLHDINE -----EPV C--VRPFNFD F-EQPTLTEE  
 ATMPK5\_B ITVEEALCYP YLSALHDIND -----EPV C--SNHFSFH F-EDPSSTEE  
 Cqu\_c17078\_1\_g0 ITVDEALNHP YLSSLHEINE -----EPT C--PKPFQFD F-EQSTLDEE  
 ATMPK1\_C ISVSEALQHP YMAPLYDPNA -----NPP A--QVPIDLD V-DED-LREE  
 Cqu\_c02858\_1\_g0 ISVTEALQHP YMSPLYDPRA -----NPP A--QFPIDLE I-DED-LXEE  
 ATMPK7\_C ISVTDALHHP YMAGLFDPGS -----NPP A--HVPISLD I-DEN-MEEP  
 ATMPK2\_C ISVTEALQHP YMAPLYDPSA -----NPP A--QVPIDLD VDEDEDLGAE  
 ATMPK14\_C ISVSDALLHP YMEGLLEPEC -----NPS E--NVPVSSL E-IDENMEGD  
 ATMPK8\_D ASAEDALADP YFSGLSNSER -----EPT TQPIISKLEFD F-ERKKLVKD  
 Cqu\_c08055\_1\_g0 PSAAEALADP YFYGLSSADR -----EPC TTPISKLEFE F-ERRKLAKD  
 ATMPK15\_D PSAAEALADP YFNGLSSKVR -----EPS TQPIISKLEFE F-ERKKLTKD  
 ATMPK9\_D PSAAEALADP YFYGLANVDR -----EPS TQPIPKLEFE F-ERRKITKE  
 ATMPK18\_D PTPAEALADP YFKGLSKIER -----EPS SQQISKMEFE F-ERRRLTKD  
 ATMPK20\_D PTAAEALADP YFKGLAKVER -----EPS CQPIITKMEFE F-ERRKVTKD  
 ATMPK19\_D PTAAEALADP YFKCLAKVER -----EPS CQPIISKMEFE F-ERRRLTKD  
 Cqu\_c06169\_1\_g0 PTAAEALADP YFKGLSRVER -----EPA CQPIISKLEFE F-ERRRVTKE  
 Cqu\_c03735\_1\_g0 ITVHEALCHP YLAPLHDINE -----EPV C--PQPFSFD F-EQPSFTEE



```

ATMPK16_D  P T A E E A L A D V Y F K G L A K V E R ----- E P S A Q P V T K L E F E F - E R R R I T K E
Cqu_c07086_1_g0 P S A E E A L A D P Y F K G L A K V E R ----- E P S A Q P V T K M E F E F - E R R R M T K E
Cqu_c09059_1_g0 P T A E E L L - K D Y M N G N E G S N Y ----- I Y P S A - - I G Q F K K Q F - A H L E E N A G
ATMPK17_D  P S A E E A L A D P Y F Q G L A N V D Y ----- E P S R Q P I S K L E F E F - E R R K L T R D
Cqu_c04094_1_g0 -----
Cqu_c01012_1_g0 -----
Cqu_c14619_1_g0 P S A E E A L A D P Y F K G L A K F A Y L E E H Y K N G S T G P P I D R Q H A S L - P R A C V L Y S
Cqu_c03126_1_g0 I T V T E A L R H S Y M A D L H I P T E ----- Y P P P - - Q R S L D I D I - - E A D V G E S
Cqu_c01012_1_g0 -----
Consistency 4 6 6 4 7 8 8 3 5 6 8 5 4 3 7 4 4 4 4 3 0 0 0 0 0 0 6 8 3 4 0 0 3 3 5 5 4 6 6 6 0 6 4 3 3 5 4 5 6
    
```

```

..... 560..... 570..... 580..... 590..... 600
ATMPK11_B  N I K E L I Y R E S V K F N P -----
ATMPK13_B  D I K E L V W R E S L H F K N M -----
ATMPK6_A   Q M K E L I Y R E A L A F N P E Y Q Q -----
ATMPK10_A  Q F R E L I Y C E A L A F N P E T S N D -----
Cqu_c04092_1_g0 Q M R E L I Y R E A L A F N P E F Q Q E -----
Cqu_c06022_1_g0 N V K E L I W K E S V K F N P D P A H -----
Cqu_c03819_1_g0 Q M K D M I H Q E A L A L N P G Y I -----
Cqu_c04159_1_g0 Q M K D M I H Q E A L A L N P G Y I -----
ATMPK3_A   Q I K E M I Y Q E A I A L N P T Y G -----
Cqu_c03402_1_g0 D I K E L V W R E T L K F N P D K M I E -----
Cqu_c03736_1_g0 N I K E L I W R E S V S F N P D P L I G -----
ATMPK12_B  H I K E L I Y K E S V K F N P D H -----
ATMPK4_B   N I K E L I Y R E T V K F N P Q D S V -----
ATMPK5_B   E I K E L V W L E S V K F N P L P S I -----
Cqu_c17078_1_g0 D I K E L V W R E T L K F N P D K M I E -----
ATMPK1_C   M I R E M M W N E M L H Y H P Q A S T L - N T - - - E L - - - - -
Cqu_c02858_1_g0 M I R E S M W Q E I M H Y H P E A I N Q - N M - - - E L C G - - - - -
ATMPK7_C   V I R E M M W N E M L Y Y H P E A E I S - N A - - - - - - - - -
ATMPK2_C   M I R E L M W K E M I H Y H P E A A T I N N N - - - E V S E F - - - - -
ATMPK14_C  M I R E M M W E E M L H Y L P R A -----
ATMPK8_D   D V R E L I Y R E I L E Y H P Q M L E E Y L R G - G - D Q L S F M Y P S G V D R F K - - - R Q F A
Cqu_c08055_1_g0 D V R E L I Y R E I L E Y H P Q M L Q E Y L R G - G Q D Q T S F M Y P S G V D R F K - - - R Q F A
ATMPK15_D  D I R E L I Y R E I L E Y H P Q M L E E Y L R G - G - N Q L S F M Y P S G V D R F R - - - R Q F A
ATMPK9_D   D V R E L I Y R E I L E Y H P Q M L Q E Y L R G - G - E Q T S F M Y P S G V D R F K - - - R Q F A
ATMPK18_D  D I R E L I Y R E I L E Y H P Q L L K D Y M S G - - - S E G S N F V Y P S A I G H L R - - - Q Q F T
ATMPK20_D  D I R E L I S R E I L E Y H P Q L L K D H M N G - - - A D K A S F L Y P S A V D Q F R - - - R Q F A
ATMPK19_D  D I R E L I Y R E I L E Y H P Q L L K D Y M N S - - - E G S S F L Y P S A I G H L R - - - K Q F A
Cqu_c06169_1_g0 D V R E L I Y R E I L E Y H P Q L L K D Y M N G - - - N E G S N Y I Y P S A I G Q F K - - - K Q F A
Cqu_c03735_1_g0 N I K E L I W R E S V S E Q H Q F L M H F L D R H P L E S L P V A A P - R L P H F K T L C T S E I Q
ATMPK16_D  D V R E L I Y R E S L E Y H P K M L K E Y L D G - - - S E P T N F M Y P S A V E H F K - - - K Q F A
Cqu_c07086_1_g0 D V R E L I Y R E I L E Y H P K M L K E F L D G - - - S E P T N F M Y P S A V D H F K - - - K Q F A
Cqu_c09059_1_g0 R S G P V I P L E R K H - - - I S L P R S T V H - - - S S T I P P K P L A S S H - - - - - K D H Q
ATMPK17_D  D V R E L M Y R E I L E Y H P Q M L Q E Y L Q G E E N I N S H F L Y P S G V D Q F K - - - Q E F A
Cqu_c04094_1_g0 -----
Cqu_c01012_1_g0 -----
Cqu_c14619_1_g0 D N S V H G S T E V T E D L S K C R I K E V ----- E K A H
Cqu_c03126_1_g0 Y L R E L I W R E M V F -----
Cqu_c01012_1_g0 -----
Consistency 4 6 6 7 6 6 5 5 8 4 6 4 5 4 6 4 2 3 2 1 0 1 0 0 0 0 1 0 0 0 0 0 1 0 0 0 0 0 0 0 0 0 0 0 0 0 0 0 0 1 0 0
    
```

```

..... 610..... 620..... 630..... 640..... 650
ATMPK11_B  -----
ATMPK13_B  -----
ATMPK6_A   -----
ATMPK10_A  -----
Cqu_c04092_1_g0 -----
Cqu_c06022_1_g0 -----
Cqu_c03819_1_g0 -----
Cqu_c04159_1_g0 -----
ATMPK3_A   -----
Cqu_c03402_1_g0 -----
Cqu_c03736_1_g0 -----
ATMPK12_B  -----
ATMPK4_B   -----
ATMPK5_B   -----
Cqu_c17078_1_g0 -----
ATMPK1_C   -----
Cqu_c02858_1_g0 -----
ATMPK7_C   -----
ATMPK2_C   -----
ATMPK14_C  -----
ATMPK8_D   H L E E N Q G K P G A A G G G R S T A - - - L H R H H A S L P R E R V P A P N G - - -
Cqu_c08055_1_g0 H L E E H L G K - - - - - G E K S T P - - - L S R Q H A S L P R E R V P A P K T - - -
    
```

```

ATMPK15_D HLEENQGP --- GGRSNA --- LQRQHAS LPRERVPASK N-----
ATMPK9_D HLEENYGK --- GEKGSF --- LQRQHAS LPRERVPAPK K-----
ATMPK18_D YLEENSSRN --- G-PVIP --- LERKHAS LPRSTVHSTV VHSTS-----
ATMPK20_D HLEENSGKT --- G-PVAP --- LERKHAS LPRSTVIHST AVARG-----
ATMPK19_D YLEENSGKS --- G-PVIP --- PDRKHAS LPRSAVHSSA VNSNA-----
Cqu_c06169_1_g0 HLEENAGRS --- G-PVIP --- LERKHIS LPRSTVHSST IPPKP-----
Cqu_c03735_1_g0 IMKNSYGLV --- Y-PSIPS RAGPKRRNSF MRGITCTSSS NSAFFLPNIP
ATMPK16_D YLEEHYKNG --- TSHNPP --- ERQHAS LPRACVLYSD NNHPV-----
Cqu_c07086_1_g0 YLEEHYKNG --- S-TGPP --- IDRQHAS LPRACVLYSD NSV-----
Cqu_c09059_1_g0 AKEE --- --- --- --- MRPSESYG-----
ATMPK17_D RLEEHNDDEE --- EHNSPP --- HQRKYTS LPRERVCSS E-----
Cqu_c04094_1_g0 -----
Cqu_c01012_1_g0 -----
Cqu_c14619_1_g0 VDRNG --- AIP --- MTRLPLQ VPQN-----
Cqu_c03126_1_g0 -----
Cqu_c01012_1_g0 -----
Consistency 0011000000 0000000000 0000010000 0110000000 0000000000

```

..... 660..... 670..... 680..... 690..... 700

```

ATMPK11_B -----
ATMPK13_B -----
ATMPK6_A -----
ATMPK10_A -----
Cqu_c04092_1_g0 -----
Cqu_c06022_1_g0 -----
Cqu_c03819_1_g0 -----
Cqu_c04159_1_g0 -----
ATMPK3_A -----
Cqu_c03402_1_g0 -----
Cqu_c03736_1_g0 -----
ATMPK12_B -----
ATMPK4_B -----
ATMPK5_B -----
Cqu_c17078_1_g0 -----
ATMPK1_C -----
Cqu_c02858_1_g0 -----
ATMPK7_C -----
ATMPK2_C -----
ATMPK14_C -----
ATMPK8_D -ETAEESSDV ERRAAAASVAS T----- L
Cqu_c08055_1_g0 -DANENNDME NRAVARTALE S----- P
ATMPK15_D -ETVEERSND IERRTTAAVA S----- T
ATMPK9_D -ENGSHNHDI ENRSIASLVT T----- L
ATMPK18_D -QPNLGATDS RRVSEFESKN GASSAGHPST SAYPTKSIGP PPRVPP---S
ATMPK20_D -GQPKLMNNT NTLNPETTQN IP---FNHA TIQA---Q QRNLS---A
ATMPK19_D -QPSLNASDS RRVSEIEPSRN GV---VPST SAYSTKPLGP PPRVP---S
Cqu_c06169_1_g0 -LASSHKDHQ AKEEMRPSES YG---NLSS SIR---Q PPRVPP---A
Cqu_c03735_1_g0 -GI IALLEDLN LLINGDPQMI PSLGKHIPVQ EAGNQTKVFG YYRFPPLNQR
ATMPK16_D -AQQSSAEVT DGLSKCSIRD ERPRGADRNA QMPMSRIPIN VPQTIQGA AV
Cqu_c07086_1_g0 --HGSTEVT EDLSKCRICE VEKAHVDRNG AIPMTRLPLQ VPQNVO---GAA
Cqu_c09059_1_g0 -NLSSSIRQP PRVPP----- A
ATMPK17_D -DEGSDSVHA QSSASVVFT P----- P
Cqu_c04094_1_g0 -----
Cqu_c01012_1_g0 -----
Cqu_c14619_1_g0 -VOGAAARPG RF-----
Cqu_c03126_1_g0 -----
Cqu_c01012_1_g0 -----
Consistency 0000000000 0000000000 0000000000 0000000000 0000000000

```

..... 710..... 720..... 730..... 740..... 750

```

ATMPK11_B -----
ATMPK13_B -----
ATMPK6_A -----
ATMPK10_A -----
Cqu_c04092_1_g0 -----
Cqu_c06022_1_g0 -----
Cqu_c03819_1_g0 -----
Cqu_c04159_1_g0 -----
ATMPK3_A -----
Cqu_c03402_1_g0 -----
Cqu_c03736_1_g0 -----
ATMPK12_B -----
ATMPK4_B -----
ATMPK5_B -----
Cqu_c17078_1_g0 -----

```

|                 |            |            |            |            |            |
|-----------------|------------|------------|------------|------------|------------|
| ATMPK1_C        | -----      | -----      | -----      | -----      | -----      |
| Cqu_c02858_1_g0 | -----      | -----      | -----      | -----      | -----      |
| ATMPK7_C        | -----      | -----      | -----      | -----      | -----      |
| ATMPK2_C        | -----      | -----      | -----      | -----      | -----      |
| ATMPK14_C       | -----      | -----      | -----      | -----      | -----      |
| ATMPK8_D        | ESEE       | AD         | NGGGYS     | ARNLMKSASI | SGSKCIG    |
| Cqu_c08055_1_g0 | PKSN       | ADGSENEVP  | QNGQNKGNYS | ARSLKKSASI | SGSKCIG    |
| ATMPK15_D       | LDSP       | KASQQAE    | TENGGGGYS  | ARNLMKSSSI | SGSKCIG    |
| ATMPK9_D        | ESPP       | TSQHEGSDY  | RNGTSQTGYS | ARSLKKSASI | SASKCIG    |
| ATMPK18_D       | GRPGRVV    | ESSVSYENG  | RNLKEAYFRS | AVSSPHCYF  | RPNTMTNPEN |
| ATMPK20_D       | AKPSTFM    | GPVAPFDNG  | RISRDAYDP  | RSFIRSTNL  | PFSQQSAATV |
| ATMPK19_D       | GKPGRVV    | ESSVTYEND  | RNLKESSYDA | RTSYRSTVL  | PPQTVSPNCY |
| Cqu_c06169_1_g0 | ARPGRVV    | GPVVAYESG  | RSMKDG YDA | RVSLQNAVI  | PPQTASPQYY |
| Cqu_c03735_1_g0 | SDFEKYALCS | PGLQYAFEAD | KCLNKSFADS | YHNFDFPPTH | ANDNLRPIAN |
| ATMPK16_D       | ARPGKVV    | GSVLRYNNC  | GAATGVEAL  | EQQRRMVRN  | PAAASQYPKR |
| Cqu_c07086_1_g0 | ARPGKVV    | GNLMRYNNC  | GVAATAEVT  | DRRPRNPSI  | PASQFPTPSS |
| Cqu_c09059_1_g0 | ARPGRVV    | GPVAYESG   | RSMKDG YD  | ARVSLQNAVI | PPQTASPQYY |
| ATMPK17_D       | QTPNTAT    | GLSSQKASQ  | VDKAATPVKR | SACLMRSDSI | CASRCVG    |
| Cqu_c04094_1_g0 | -----      | -----      | -----      | -----      | -----      |
| Cqu_c01012_1_g0 | -----      | -----      | -----      | -----      | -----      |
| Cqu_c14619_1_g0 | -----      | -----      | -----      | -----      | SETLCVI    |
| Cqu_c03126_1_g0 | -----      | -----      | -----      | -----      | -----      |
| Cqu_c01012_1_g0 | -----      | -----      | -----      | -----      | -----      |
| Consistency     | 0000000000 | 0000000000 | 0000000000 | 0000000000 | 0000000000 |

. . . . . 760 . . . . . 770 . . . . . 780 . . . . . 790 . . . . . 800

|                 |            |            |            |            |            |
|-----------------|------------|------------|------------|------------|------------|
| ATMPK11_B       | -----      | -----      | -----      | -----      | -----      |
| ATMPK13_B       | -----      | -----      | -----      | -----      | -----      |
| ATMPK6_A        | -----      | -----      | -----      | -----      | -----      |
| ATMPK10_A       | -----      | -----      | -----      | -----      | -----      |
| Cqu_c04092_1_g0 | -----      | -----      | -----      | -----      | -----      |
| Cqu_c06022_1_g0 | -----      | -----      | -----      | -----      | -----      |
| Cqu_c03819_1_g0 | -----      | -----      | -----      | -----      | -----      |
| Cqu_c04159_1_g0 | -----      | -----      | -----      | -----      | -----      |
| ATMPK3_A        | -----      | -----      | -----      | -----      | -----      |
| Cqu_c03402_1_g0 | -----      | -----      | -----      | -----      | -----      |
| Cqu_c03736_1_g0 | -----      | -----      | -----      | -----      | -----      |
| ATMPK12_B       | -----      | -----      | -----      | -----      | -----      |
| ATMPK4_B        | -----      | -----      | -----      | -----      | -----      |
| ATMPK5_B        | -----      | -----      | -----      | -----      | -----      |
| Cqu_c17078_1_g0 | -----      | -----      | -----      | -----      | -----      |
| ATMPK1_C        | -----      | -----      | -----      | -----      | -----      |
| Cqu_c02858_1_g0 | -----      | -----      | -----      | -----      | -----      |
| ATMPK7_C        | -----      | -----      | -----      | -----      | -----      |
| ATMPK2_C        | -----      | -----      | -----      | -----      | -----      |
| ATMPK14_C       | -----      | -----      | -----      | -----      | -----      |
| ATMPK8_D        | VQSKTDKEDT | IAEEEDNETV | AELTDKVASL | HNS        | -----      |
| Cqu_c08055_1_g0 | VQSRKDPEEE | PIAENEEAV  | DELTKKATAL | AT         | -----      |
| ATMPK15_D       | VQSKTNIED  | SIVEEQD    | ETVAVKVASL | HNS        | -----      |
| ATMPK9_D        | MKPRNKSEYG | ESNNDTV    | DALSQKVAAL | HT         | -----      |
| ATMPK18_D       | RNIEASSFPP | KPQNPVHQ   | FSPTEPP    | AATTNQADVE | TMNHPNPYFQ |
| ATMPK20_D       | AMGKQQERRT | TMEPE      | KQARQIS    | QYNRYAPDVA | INIDNNPFIM |
| ATMPK19_D       | FLPNTMNQEK | RSGTEAAS   | QPKPQFV    | PTQCNSAKP  | AELNPNPYVQ |
| Cqu_c06169_1_g0 | IRPNIQPAQS | KPGLGAGNEQ | GHVSWAKQQQ | LPVQPTHEVT | IDINTNPHYH |
| Cqu_c03735_1_g0 | FLHMNNSMAW | FHQVKAVAAT | VAKYFTGPLL | PRRSLLATQL | IREFFFPLLS |
| ATMPK16_D       | TQPCKSNRGD | EDCATAAEGP | SRLKPN     | QYIPQKVSAA | QDTAMSRWY  |
| Cqu_c07086_1_g0 | SYPKRNPCK  | NERGEDDSME | GSNGLQPK   | QYLARKVAAA | QAGPGSQWY  |
| Cqu_c09059_1_g0 | IRPNIQPAQS | KPGLGAGNEQ | GHVSWAKQQQ | LPVQPTHEVT | IDINTNPHYH |
| ATMPK17_D       | VSSAVS     | -----      | -----      | -----      | -----      |
| Cqu_c04094_1_g0 | -----      | -----      | -----      | -----      | -----      |
| Cqu_c01012_1_g0 | -----      | -----      | -----      | -----      | -----      |
| Cqu_c14619_1_g0 | NNCGVAATAE | VTDRRPGEIH | RYLPLNSLHL | PKPQYLARKV | AAAQAGP    |
| Cqu_c03126_1_g0 | -----      | -----      | -----      | -----      | -----      |
| Cqu_c01012_1_g0 | -----      | -----      | -----      | -----      | -----      |
| Consistency     | 0000000000 | 0000000000 | 0000000000 | 0000000000 | 0000000000 |

. . . . . 810 . . . . . 820 . . . . . 830 . . . . . 840 . . . . . 850

|                 |       |       |       |       |       |
|-----------------|-------|-------|-------|-------|-------|
| ATMPK11_B       | ----- | ----- | ----- | ----- | ----- |
| ATMPK13_B       | ----- | ----- | ----- | ----- | ----- |
| ATMPK6_A        | ----- | ----- | ----- | ----- | ----- |
| ATMPK10_A       | ----- | ----- | ----- | ----- | ----- |
| Cqu_c04092_1_g0 | ----- | ----- | ----- | ----- | ----- |
| Cqu_c06022_1_g0 | ----- | ----- | ----- | ----- | ----- |
| Cqu_c03819_1_g0 | ----- | ----- | ----- | ----- | ----- |
| Cqu_c04159_1_g0 | ----- | ----- | ----- | ----- | ----- |

```

ATMPK3_A -----
Cqu_c03402_1_g0-----
Cqu_c03736_1_g0-----
ATMPK12_B -----
ATMPK4_B -----
ATMPK5_B -----
Cqu_c17078_1_g0-----
ATMPK1_C -----
Cqu_c02858_1_g0-----
ATMPK7_C -----
ATMPK2_C -----
ATMPK14_C -----
ATMPK8_D -----
Cqu_c08055_1_g0-----
ATMPK15_D -----
ATMPK9_D -----
ATMPK18_D PQLPKTDQLN NNTHMAIDAK LLQAQ-----SQFG-PAG AA---AVAVA
ATMPK20_D ARTGMNKAEN ISDRIIDTN LLQAT-----AGIG-VAA AAAAAAPGGS
ATMPK19_D SQH-----KVGIDAK LLHAQ-----SQYG-PAG AA---AVAVA
Cqu_c06169_1_g0PQPKSDQ---YSSRVALDAK IMQAQ-----S-QFS AT---AVAMS
Cqu_c03735_1_g0ASPPVTNPNT HTEALAAALAQ THIQMFIGHP YLSQFGHPVG SGPFWAFRPI
ATMPK16_D -----
Cqu_c07086_1_g0-----
Cqu_c09059_1_g0PQPKSDQ---YSSRVALDAK IMQAQS-----QFS AT---AVAMS
ATMPK17_D -----
Cqu_c04094_1_g0-----
Cqu_c01012_1_g0-----
Cqu_c14619_1_g0-----GSQGTKCT YLQFW-----
Cqu_c03126_1_g0-----
Cqu_c01012_1_g0-----
Consistency 0000000000 0000000000 0000000000 0000000000 0000000000

```

..... 860..... 870.....

```

ATMPK11_B -----
ATMPK13_B -----
ATMPK6_A -----
ATMPK10_A -----
Cqu_c04092_1_g0-----
Cqu_c06022_1_g0-----
Cqu_c03819_1_g0-----
Cqu_c04159_1_g0-----
ATMPK3_A -----
Cqu_c03402_1_g0-----
Cqu_c03736_1_g0-----
ATMPK12_B -----
ATMPK4_B -----
ATMPK5_B -----
Cqu_c17078_1_g0-----
ATMPK1_C -----
Cqu_c02858_1_g0-----
ATMPK7_C -----
ATMPK2_C -----
ATMPK14_C -----
ATMPK8_D -----
Cqu_c08055_1_g0-----
ATMPK15_D -----
ATMPK9_D -----
ATMPK18_D AHRNIGTISY -SAAS-----
ATMPK20_D AHRKVGAVRY -GMSKMY-----
ATMPK19_D AHRNIGAVGY -GMS-----
Cqu_c06169_1_g0AHRNVGTVQY -GMS-----
Cqu_c03735_1_g0AKSEVDDSSY LSLSRCVKRL MKYKE
ATMPK16_D -----
Cqu_c07086_1_g0-----
Cqu_c09059_1_g0AHRNVGTVQY -GMS-----
ATMPK17_D -----
Cqu_c04094_1_g0-----
Cqu_c01012_1_g0-----
Cqu_c14619_1_g0-----QTR LPIHSLLGRL WLRTG
Cqu_c03126_1_g0-----
Cqu_c01012_1_g0-----
Consistency 0000000000 0000000000 000000

```

## Additional supplemental data

### *GyrA*, *CheA* sequences of quinoa endophytic bacteria

#### >*GyrA* partial sequence

```
AGCGTTATCGTATCCCGGGCGCTTCCGGATGTGCGTGACGGTCTGAAGCCGGTTCACAGA
CGGATTTTTGTACGCGATGAATGATTTAGGCATGACCAGTGACAAACCATATAAAAAATCT
GCCCCGTATCGTCGGTGAAGTTATCGGTAAGTACCACCCGCACGGTGACTCAGCGGTTTAC
GAATCAATGGTCAGAATGGCGCAGGATTTTAAACAACCGCTACATGCTTGTTGACGGACAC
GGCAACTTCGGTTCGGTTGACGGCGACTCAGCGGCCGCGATGCGTTACACAGAAGCGAGA
ATGTCAAAAATCGCAATGGAAATCCTCCGGGACATTACGAAAGATACGATTGATTATCAA
GATAACTATGACGGCGCAGAAAGAGAACCTGTCTCATGCCTTCGAGATTTCCGAATCTG
CTCGTCAACGGAGCTGCCGGTATCGCGGCCGGAATGGCGACAAATATTCTCCGCATCAG
CTTGGGGAAGTCATTGAAGGGCGTGCTTGCCGTAAG
```

#### >*CheA* partial sequence

```
GGAAGGAGATGGTGCAGTCCATTATTGACGGAGGAGACGGCAAACGTGATATTTCTGAAG
TGAGTGCGAAGCTCGACGTAAATGCGGTGCATGAGACTGCGGCTTCAGCCGAAACAGCAG
AACCGCCGGCTTCAAAAACAACAGGCTTCAACTGAATGGAATTATGATGAGTTCGAACGGA
CTGTTATTGAAGAGGCGGAAGAGCAAGGATTCAGCCGCTATGAAATAACGGTTTCCCTGA
ATGAAAGCTGCATGCTCAAAGCCGTGCGCGTGTACATGATATTTGAAAAGCTGAATGAAG
CCGGGGAAGTCGAAAAACGATACCCGCCGCGGAAGTGCTTGAGACGGAAGATTTTCGAA
CGGATTTTTCAGGTGTGTTTCTTAACAAAGC
```

### List of primers used in colony PCRs

|          |                                |                     |
|----------|--------------------------------|---------------------|
| Flg_fo   | ATGAGAATTAACCACAATAT           | (Asano et al. 2001) |
| Flg_re   | GTTGGTTTGCTTGAGCAAGC           |                     |
| PeBA1_fo | ATGGCTAACCAGAAGAAGAAAAC        | (Wang et al. 2016). |
| PeBA1_re | TTATCCGTTTACGATGGTGTC          |                     |
| BmyD_fo  | GCTCTTGATGACCTTCTCTGCG         | (Xu et al. 2013)    |
| BmyD_re  | ATTTTGTGCGATTGGTTCTGTT         |                     |
| GyrA_fo  | CAGTCAGGAAATGCGTACGTCCCTT      | (Reva et al. 2004)  |
| GyrA_re  | CAAGGTAATGCTCCAGGCATTGCT       |                     |
| CheA_fo  | AGGGCTGCCCATACATTAAGGAATGAGC   |                     |
| CheA_re  | AGTTTCAACCGGGACCATTCTCATATTCAG |                     |

Asano Y, Onishi H, Tajima K, Shinozawa T (2001) Flagellin as a biomarker for *Bacillus subtilis* strains; Application to the DB9011 strain and the study of interspecific diversity in amino-acid sequences. *Biosci Biotech Bioch* 65: 1218-1222. doi: DOI 10.1271/bbb.65.1218.

Reva ON, Dixelius C, Meijer J, Priest FG (2004) Taxonomic characterization and plant colonizing abilities of some bacteria related to *Bacillus amyloliquefaciens* and *Bacillus subtilis*. *FEMS microbiology ecology* 48: 249-259. doi: 10.1016/j.femsec.2004.02.003.

Wang N, Liu M, Guo L, Yang X, Qiu D (2016) A Novel Protein Elicitor (PeBA1) from *Bacillus amyloliquefaciens* NC6 Induces Systemic Resistance in Tobacco. *International Journal of Biological Sciences* 12: 757-767. doi: 10.7150/ijbs.14333.

Xu Z, Shao J, Li B, Yan X, Shen Q, Zhang R (2013) Contribution of bacillomycin D in *Bacillus amyloliquefaciens* SQR9 to antifungal activity and biofilm formation. *Applied and environmental microbiology* 79: 808-815. doi: 10.1128/AEM.02645-12.
